# Supplementary material for: Risk Factors for Severe Diarrhea with an Afatinib Treatment of Non-Small Cell Lung Cancer: A Pooled Analysis of Clinical Trials
Source: MDPI journal article supplement (doi:10.3390/cancers10100384), 2018-10-15
Supplement: s1 [file s1]

# **Supplementary Materials: Risk Factors for Severe Diarrhea with an Afatinib Treatment of Non-Small Cell Lung Cancer: A pooled Analysis of Clinical Trials.**

Ashley M Hopkins, Anh-Minh Nguyen, Christos S Karapetis, Andrew Rowland and Michael J Sorich

**Table S1.** Summary by study of pre-treatment participant characteristics.

| <b>Baseline Characteristic</b>       | <b>Total<br/>No. 1151</b> | <b>LUX-Lung 1<br/>No. 390</b> | <b>LUX-Lung 2<br/>No. 129</b> | <b>LUX-Lung 3<br/>No. 229</b> | <b>LUX-Lung 4<br/>No. 62</b> | <b>LUX-Lung 6<br/>No. 239</b> | <b>BI-1200.40<br/>No. 69</b> | <b>BI-1200.41<br/>No. 33</b> |
|--------------------------------------|---------------------------|-------------------------------|-------------------------------|-------------------------------|------------------------------|-------------------------------|------------------------------|------------------------------|
| Age (years)                          | 60 (52–68)                | 58 (51–66)                    | 61 (53–71)                    | 62 (55–68)                    | 65 (58–72)                   | 58 (49–65)                    | 66 (58–72)                   | 66 (53–71)                   |
| Sex                                  |                           |                               |                               |                               |                              |                               |                              |                              |
| Male                                 | 443 (38%)                 | 159 (41%)                     | 54 (42%)                      | 82 (36%)                      | 14 (23%)                     | 87 (36%)                      | 35 (51%)                     | 12 (36%)                     |
| Female                               | 708 (62%)                 | 231 (59%)                     | 75 (58%)                      | 147 (64%)                     | 48 (77%)                     | 152 (64%)                     | 34 (49%)                     | 21 (64%)                     |
| Race                                 |                           |                               |                               |                               |                              |                               |                              |                              |
| Asian                                | 839 (73%)                 | 261 (67%)                     | 112 (87%)                     | 165 (72%)                     | 62 (100%)                    | 239 (100%)                    | 0 (0%)                       | 0 (0%)                       |
| White                                | 299 (26%)                 | 121 (31%)                     | 16 (12%)                      | 61 (27%)                      | 0 (0%)                       | 0 (0%)                        | 69 (100%)                    | 32 (97%)                     |
| Other                                | 13 (1%)                   | 8 (2%)                        | 1 (1%)                        | 3 (1%)                        | 0 (0%)                       | 0 (0%)                        | 0 (0%)                       | 1 (3%)                       |
| ECOG performance score               |                           |                               |                               |                               |                              |                               |                              |                              |
| 0                                    | 385 (33%)                 | 92 (24%)                      | 83 (64%)                      | 92 (40%)                      | 29 (47%)                     | 48 (20%)                      | 33 (48%)                     | 8 (24%)                      |
| 1                                    | 726 (63%)                 | 268 (69%)                     | 42 (33%)                      | 137 (60%)                     | 33 (53%)                     | 191 (80%)                     | 35 (51%)                     | 20 (61%)                     |
| 2                                    | 40 (3%)                   | 30 (8%)                       | 4 (3%)                        | 0 (0%)                        | 0 (0%)                       | 0 (0%)                        | 1 (1%)                       | 5 (15%)                      |
| Prior EGFR inhibitor                 | 479 (42%)                 | 390 (100%)                    | 0 (0%)                        | 0 (0%)                        | 62 (100%)                    | 0 (0%)                        | 0 (0%)                       | 27 (82%)                     |
| Prior chemotherapy                   | 595 (52%)                 | 390 (100%)                    | 71 (55%)                      | 0 (0%)                        | 62 (100%)                    | 0 (0%)                        | 28 (41%)                     | 18 (55%)                     |
| Afatinib starting dose               |                           |                               |                               |                               |                              |                               |                              |                              |
| 40 mg                                | 498 (43%)                 | 0 (0%)                        | 30 (23%)                      | 229 (100%)                    | 0 (0%)                       | 239 (100%)                    | 0 (0%)                       | 0 (0%)                       |
| 50 mg                                | 653 (57%)                 | 390 (100%)                    | 99 (77%)                      | 0 (0%)                        | 62 (100%)                    | 0 (0%)                        | 69 (100%)                    | 33 (100%)                    |
| Weight (kg)                          |                           |                               |                               |                               |                              |                               |                              |                              |
| Median (IQR)                         | 61 (53–70)                | 62 (55–71)                    | 62 (55–72)                    | 60 (52–69)                    | 51 (46–60)                   | 60 (54–65)                    | 67 (60–75)                   | 73 (59–80)                   |
| Missing                              | 3 (0%)                    | 2 (1%)                        | 0 (0%)                        | 0 (0%)                        | 0 (0%)                       | 0 (0%)                        | 0 (0%)                       | 1 (3%)                       |
| Body mass index (kg/m <sup>2</sup> ) |                           |                               |                               |                               |                              |                               |                              |                              |
| Median (IQR)                         | 23 (21–26)                | 24 (21–26)                    | 24 (22–26)                    | 24 (21–26)                    | 22 (20–24)                   | 23 (21–24)                    | 24 (23–26)                   | 25 (23–28)                   |
| Missing                              | 10 (1%)                   | 6 (2%)                        | 1 (1%)                        | 0 (0%)                        | 0 (0%)                       | 0 (0%)                        | 0 (0%)                       | 3 (9%)                       |
| Body surface area (m <sup>2</sup> )  |                           |                               |                               |                               |                              |                               |                              |                              |
| Median (IQR)                         | 1.7 (1.5–1.8)             | 1.7 (1.5–1.8)                 | 1.7 (1.5–1.8)                 | 1.6 (1.5–1.8)                 | 1.5 (1.4–1.6)                | 1.6 (1.5–1.7)                 | 1.8 (1.6–1.9)                | 1.8 (1.6–1.9)                |
| Missing                              | 10 (1%)                   | 6 (2%)                        | 1 (1%)                        | 0 (0%)                        | 0 (0%)                       | 0 (0%)                        | 0 (0%)                       | 3 (9%)                       |
| eGFR (ml/min/1.73 m <sup>2</sup> )   |                           |                               |                               |                               |                              |                               |                              |                              |
| Median (IQR)                         | 91 (76–109)               | 84 (70–101)                   | 81 (67–93)                    | 98 (86–115)                   | 93 (80–111)                  | 102 (84–122)                  | 87 (74–99)                   | 88 (75–98)                   |
| Missing                              | 5 (0%)                    | 4 (1%)                        | 0 (0%)                        | 0 (0%)                        | 0 (0%)                       | 0 (0%)                        | 1 (1%)                       | 0 (0%)                       |
| Hemoglobin (g/L)                     |                           |                               |                               |                               |                              |                               |                              |                              |
| Median (IQR)                         | 128 (117–138)             | 126 (115–136)                 | 127 (111–140)                 | 130 (119–140)                 | 126 (118–135)                | 129 (121–141)                 | 130 (119–137)                | 127 (117–139)                |
| Missing                              | 5 (0%)                    | 4 (1%)                        | 0 (0%)                        | 0 (0%)                        | 0 (0%)                       | 1 (0%)                        | 0 (0%)                       | 0 (0%)                       |

ECOG: Eastern Cooperative Oncology Group, eGFR: Estimated glomerular filtration rate, IQR: interquartile range.

**Table S2.** Multivariable logistic regression analysis of association between pre-treatment characteristics and grade  $\geq 3$  diarrhea with afatinib, including adjustment for afatinib starting dose.

| Baseline Characteristic            | Multivariable analysis * |           |        |
|------------------------------------|--------------------------|-----------|--------|
|                                    | OR                       | 95% CI    | P      |
| Afatinib dose                      |                          |           | <0.001 |
| 40 mg                              | 1.00                     |           |        |
| 50 mg                              | 2.16                     | 1.47–3.17 |        |
| Sex                                |                          |           | <0.001 |
| Male                               | 1.00                     |           |        |
| Female                             | 2.13                     | 1.42–3.19 |        |
| Age (years)                        |                          |           | 0.001  |
| 27–49                              | 1.00                     |           |        |
| 50–59                              | 1.41                     | 0.79–2.50 |        |
| 60–69                              | 2.51                     | 1.47–4.30 |        |
| 70–86                              | 2.19                     | 1.21–3.96 |        |
| Race <sup>†</sup>                  |                          |           | 0.098  |
| Asian                              | 1.00                     |           |        |
| Non-Asian                          | 1.37                     | 0.94–2.00 |        |
| Weight (kg)                        |                          |           | <0.001 |
| $\geq 50$                          | 1.00                     |           |        |
| 45–49                              | 1.63                     | 0.94–2.84 |        |
| 40–44                              | 2.27                     | 1.17–4.42 |        |
| <40                                | 9.54                     | 2.89–31.5 |        |
| eGFR (ml/min/1.73 m <sup>2</sup> ) |                          |           | 0.308  |
| $\geq 90$                          | 1.00                     |           |        |
| 60–89                              | 1.39                     | 0.96–2.01 |        |
| 45–59                              | 1.23                     | 0.62–2.46 |        |
| <45                                | 1.97                     | 0.55–7.06 |        |
| ECOG PS                            |                          |           | 0.090  |
| 0                                  | 1.00                     |           |        |
| 1+                                 | 0.74                     | 0.52–1.05 |        |
| Hemoglobin (g/L)                   |                          |           | 0.505  |
| 75 to 117                          | 1.00                     |           |        |
| 118 to 128                         | 0.92                     | 0.59–1.43 |        |
| 129 to 138                         | 0.70                     | 0.44–1.13 |        |
| 139 to 185                         | 0.92                     | 0.55–1.52 |        |

BMI: body mass index; BSA: body surface area; CI: confidence interval, ECOG PS: Eastern Cooperative Oncology Group performance status, eGFR: estimated glomerular filtration rate, N: number of patients, OR: odds ratio.

**Table S3.** Coefficients of multivariable logistic regression model of severe diarrhea with afatinib.

| Term                                     | Coefficient | Standard Error |
|------------------------------------------|-------------|----------------|
| Intercept                                | −4.74       | 0.54           |
| Weight <sup>-2</sup> (kg <sup>-2</sup> ) | 2233        | 683            |
| Female sex                               | 0.607       | 0.20           |
| Age (years)                              | 0.0329      | 0.0078         |

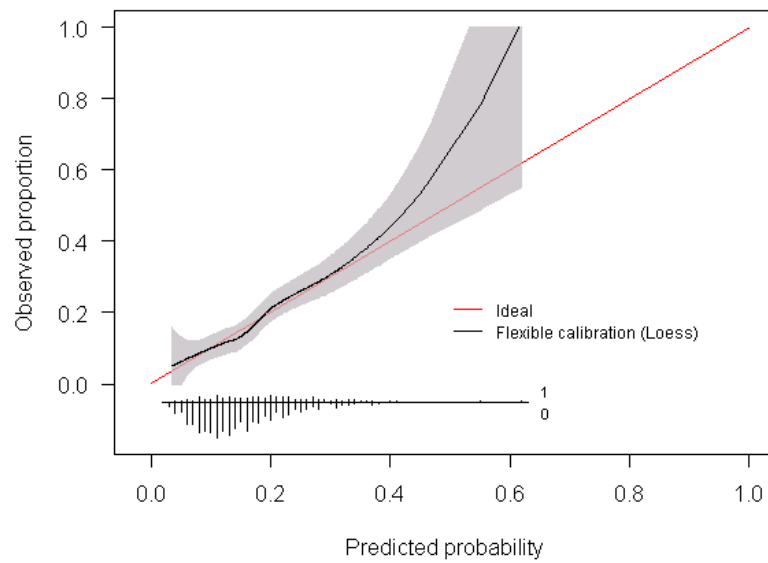

**Figure S1.** Calibration plot for the multivariable logistic regression model of severe diarrhea with afatinib.
